# Supplementary material for: Systematic review of psychosocial needs assessment tools for caregivers of paediatric patients with dermatological conditions
Source: HighWire-hosted journal article supplement (doi:10.1136/bmjopen-2021-055777), 2022-01-01
Supplement: bmjopen-2021-055777supp003_data_supplement.pdf [file bmjopen-2021-055777supp003_data_supplement.pdf]

### Supplementary file 3: Number of records identified during supplementary searches

Grey literature, bibliographies, online databases of QoL tools and several trial registers were searched on 01 April 2020 and updated on 05 Oct 2021.

**Table 1: Records identified during original and updated supplementary searches**

| Tools included in search                                                                                                                           | Search category/term                                  | Records (n) identified during original search (01 Jan 2000 to 01 April 2020) | Records (n) identified during updated search (01 April 2020 to 05 Oct 2021) | Number accessed in full text | Relevant (included in review) |
|----------------------------------------------------------------------------------------------------------------------------------------------------|-------------------------------------------------------|------------------------------------------------------------------------------|-----------------------------------------------------------------------------|------------------------------|-------------------------------|
| Controlled Trials ISRCTN ( <a href="http://www.controlled-trials.com/isrctn/">www.controlled-trials.com/isrctn/</a> )                              | 'Skin and Connective Tissue Diseases'                 | 241                                                                          | 2                                                                           | 3                            | 0                             |
| United Kingdom (UK) Clinical Trials Gateway ( <a href="http://www.ukctg.nihr.ac.uk/default.aspx">www.ukctg.nihr.ac.uk/default.aspx</a> )           | 'Skin and Cosmetic health'                            | 72                                                                           | 2                                                                           | 0                            | 0                             |
| United States(US) National Institutes of Health Ongoing Trials Register ( <a href="http://www.clinicaltrials.gov">www.clinicaltrials.gov</a> )     | 'caregiver' and 'skin diseases'                       | 24                                                                           | 0                                                                           | 1                            | 0 (recruitment stage)         |
| Australian New Zealand Clinical Trials Registry ( <a href="http://www.anzctr.org.au">www.anzctr.org.au</a> )                                       | 'caregiver' and 'skin'                                | 25                                                                           | 0                                                                           | 0                            | 0                             |
| World Health Organization International Clinical Trials Registry platform ( <a href="http://www.who.int/trialsearch">www.who.int/trialsearch</a> ) | 'skin' and 'caregiver'                                | 182                                                                          | 1                                                                           | 0                            | 0                             |
| EU Clinical Trials Register ( <a href="https://www.clinicaltrialsregister.eu/">https://www.clinicaltrialsregister.eu/</a> )                        | 'skin' and 'caregiver'                                | 30                                                                           | 1                                                                           | 0                            | 0                             |
| British Library Electronic Theses Online Service (EThOS) was searched using several combinations of key words                                      | skin, instrument, caregiver, validation, psychosocial | 0                                                                            | 2                                                                           | 2                            | 0                             |
| OpenGrey database ( <a href="http://www.opengrey.eu/">www.opengrey.eu/</a> ) was searched (up to 22 November 2013)                                 | 'Skin Diseases'                                       | 89                                                                           | 1                                                                           | 0                            | 0                             |
| Patient-Reported Outcome and Quality of Life Instruments Database (PROQOLID) (2002)                                                                |                                                       | 0                                                                            | 0                                                                           | 0                            | 0                             |
| Handsearching of the bibliographies of included and excluded studies                                                                               |                                                       | 48                                                                           | 3                                                                           | 0                            | 0                             |
| <b>Total</b>                                                                                                                                       |                                                       | <b>711</b>                                                                   | <b>12</b>                                                                   | <b>6</b>                     | <b>0</b>                      |
