# Supplementary material for: Systematic review of psychosocial needs assessment tools for caregivers of paediatric patients with dermatological conditions
Source: HighWire-hosted journal article supplement (doi:10.1136/bmjopen-2021-055777), 2022-01-01
Supplement: bmjopen-2021-055777supp004_data_supplement.pdf [file bmjopen-2021-055777supp004_data_supplement.pdf]

## Supplementary file 4: Methodological domains of the risk of bias criteria

| Domains                                                                                  | Definitions                                                                                                                                                                                                                                                            | Grades and Criteria                                                                                                                               |                                                                                                                                                      |                                                                                                      |
|------------------------------------------------------------------------------------------|------------------------------------------------------------------------------------------------------------------------------------------------------------------------------------------------------------------------------------------------------------------------|---------------------------------------------------------------------------------------------------------------------------------------------------|------------------------------------------------------------------------------------------------------------------------------------------------------|------------------------------------------------------------------------------------------------------|
| Validity<br>Conceptual <sup>1</sup><br>Construct <sup>2</sup><br>Convergent <sup>3</sup> | Does the tool measure what it is supposed to measure?<br>Are the relevant domains captured?<br>Does tool confirm hypothesized difference (eg diagnosis, clinical disease severity, others)<br>Does the tool relate to other tools measuring the same construct?        | A1: well balanced, objective and subjective domains<br>B1: more focused on objective or subjective domains<br>C1: missing important HRQOL domains | A2:>75% of results are in accordance with specific hypotheses<br>B2: <75 of results are in accordance with specific hypotheses<br>C2: no information | A3: correlation><br>B3: correlation <<br>C3: no information                                          |
| Interpretability<br>Norms<br>Categorization<br>MCID <sup>4</sup>                         | Are there standard comparative data from the general population and/or dermatology patients published and/or available?<br>Are there categories of the obtained score available?<br>Has the minimal change that is relevant to patients been reported?                 | A1: general and dermatology patients<br>B1: general or dermatology patients<br>C1: general nor dermatology patients                               | A2: using anchor or banding techniques<br>B2: using distribution-based techniques<br>C2: not reported                                                | A3: MCID is known in heterogeneous sample<br>B3: MCID is known in limited sample<br>C3: not reported |
| Reliability <sup>3,6</sup><br>Internal consistency<br>Retest-reliability                 | Does the tool provide a consistent answer?<br>The extents to which items in a (sub) scale are intercorrelated, thus measuring the same construct (Cronbach's x)?<br>Does a repeated administration of the tool within a reasonable period result in a similar outcome? | A1: 0.95>Cronbach's x>0.70<br>B1: Cronbach's x<0.7 or >0.95<br>C: Cronbach's x not reported                                                       | A2: x or ICC >0.7<br>B2: x or ICC <0.7 or correlation coefficients >0.7<br>C2: x or ICC not reported or correlation coefficient <0.7                 |                                                                                                      |
| Structure                                                                                | Have the domains and/or summary score of the tool been confirmed?                                                                                                                                                                                                      | A: item response theory<br>B: Factor analysis<br>C: no factor analysis or item response theory                                                    |                                                                                                                                                      |                                                                                                      |
| Responsiveness                                                                           | Is the tool sensitive to detect changes over time or due to therapy using patient centred and/or clinical criteria?                                                                                                                                                    | A: strong<br>B: moderate or conflicting evidence<br>C: absent, weak or solely based on statistical evidence                                       |                                                                                                                                                      |                                                                                                      |

| Domains                                                                                                                                                                                                                                                                                                                                                                                                                                                                                                                                                                                                                                                                                                                                                                                                                                                                                                                                                                                                                                                                                                                                                                                                                                                                         | Definitions                                                                                                                                                           | Grades and Criteria                                                                                |                                          |
|---------------------------------------------------------------------------------------------------------------------------------------------------------------------------------------------------------------------------------------------------------------------------------------------------------------------------------------------------------------------------------------------------------------------------------------------------------------------------------------------------------------------------------------------------------------------------------------------------------------------------------------------------------------------------------------------------------------------------------------------------------------------------------------------------------------------------------------------------------------------------------------------------------------------------------------------------------------------------------------------------------------------------------------------------------------------------------------------------------------------------------------------------------------------------------------------------------------------------------------------------------------------------------|-----------------------------------------------------------------------------------------------------------------------------------------------------------------------|----------------------------------------------------------------------------------------------------|------------------------------------------|
| Item bias                                                                                                                                                                                                                                                                                                                                                                                                                                                                                                                                                                                                                                                                                                                                                                                                                                                                                                                                                                                                                                                                                                                                                                                                                                                                       | Do the items of the tool function similar across external factors such as age, gender and diagnosis?                                                                  | A: strong<br>B: moderate or conflicting evidence<br>C: absent or weak                              |                                          |
| Cultural issues<br>Translations<br>Cultural equivalence                                                                                                                                                                                                                                                                                                                                                                                                                                                                                                                                                                                                                                                                                                                                                                                                                                                                                                                                                                                                                                                                                                                                                                                                                         | Has the tool been translated using guidelines?<br>Has the tool been analysed in a cultural equivalence study?                                                         | A1: always<br>B1: sometimes<br>C1: never, not reported                                             | A2: always<br>B2: sometimes<br>C2: never |
| Respondent burden                                                                                                                                                                                                                                                                                                                                                                                                                                                                                                                                                                                                                                                                                                                                                                                                                                                                                                                                                                                                                                                                                                                                                                                                                                                               | Is the length and content acceptable to the patients?                                                                                                                 | A: brief (<15min)<br>B: long or problems of acceptability<br>C: long and problems of acceptability |                                          |
| Administrative burden                                                                                                                                                                                                                                                                                                                                                                                                                                                                                                                                                                                                                                                                                                                                                                                                                                                                                                                                                                                                                                                                                                                                                                                                                                                           | How easy is the tool to administer, score and interpret?                                                                                                              | A: simple<br>B: moderate<br>C: complex                                                             |                                          |
| Alternative forms                                                                                                                                                                                                                                                                                                                                                                                                                                                                                                                                                                                                                                                                                                                                                                                                                                                                                                                                                                                                                                                                                                                                                                                                                                                               | Is the tool available and tested for alternate forms of administration such as interviews in person or telephone, self-administration or computer-assisted interviews | A: strong evidence<br>B: moderate or conflicting evidence<br>C: absent or weak evidence            |                                          |
| <p><b>Legend:</b> ICC, intraclass correlation coefficient; <sup>1</sup> Adjusted from Lohr et al (1996); Andresen (2000) and Terwee et al (2007); <sup>2</sup> Objective and subjective domains are described by Muldoon et al (1998); <sup>3</sup> Criteria of construct validity and reliability were based on description by Terwee et al (2007); <sup>4</sup> MCID, minimal clinically important difference (ie the minimal difference, which is measured and is relevant to a patient and is not due to intrinsic variance of the instrument); <sup>5</sup> Refer to Table 2; <sup>6</sup> Reliability is concerned with the temporal stability of instrument scores (test-retest) and internal consistency, which is estimated by Cronbach's <math>\alpha</math>, evaluates the relationship between all items (of a scale) and their ability to measure a single underlying domain. Test-retest reliability assess score consistency over two points in time assuming no change in health status and may provide a more rigorous of reliability due to the different sources of variance. Test-retest reliability should best be expressed in a <math>\kappa</math> coefficient or ICC. Spearman's correlation coefficients are less optimal for retest reliability.</p> |                                                                                                                                                                       |                                                                                                    |                                          |
